# Supplementary material for: Notch signaling modulates proliferation and differentiation of intestinal crypt base columnar stem cells
Source: Oxford University Press journal article supplement (doi:10.1242/dev.070763), 2011-12-22
Supplement: dev070763figs5.pdf [file dev070763figs5.pdf]

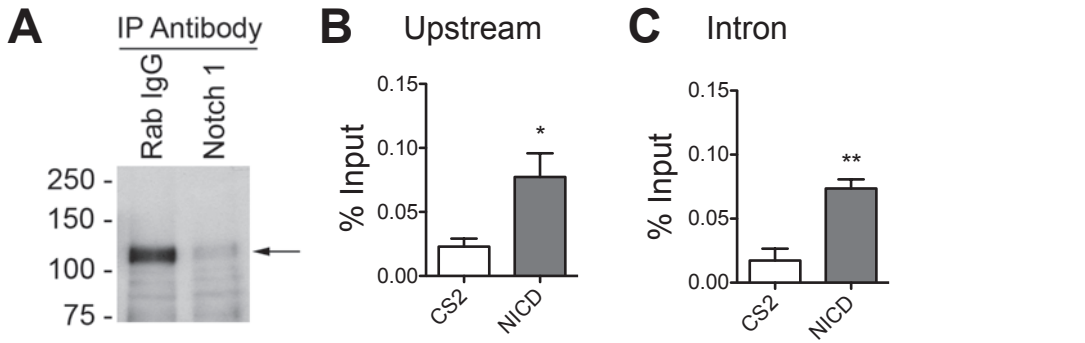

**D** Upstream Sequence

agaggctactagca **aatgagaa** cagatttgccatttgttttggtgggaat -1923  
 cgggaggaagaggggaattgtgctgggaggtagagacacattcttctct  
 tatgtccatattcattgcaattcaatcttagaataatggattcagtcctcc  
 agttttca **ttctcaca** c attctgtatgcattccctgccttggaactggga  
 tctaagtggttagaacatttgaccaagaggccaaggctgaactgcttc  
 cacagagaacaatgaacttacagccacatttctccctatctgttctc  
 ttcaactctctatccatccatttgtggttttctgtctccccttcccctc  
 cccaccaccccagtttctgaatagtgtaccaggggttaagaccctgtt  
**ctcaca** attagcactgtgcttattctgagagtttgtgtggagcttctgggg  
 tggggtggagtggggcatgaaccttctcctgttttgaaccagcaat  
 cttacatattgatctagtctttaggaaattaaacaacaatgaaaagct  
 gacatttttggcagctcaaaagtcataagcaac **ttcccata** caatatt  
 tcathtaattcaacaatttaggaattgttacaaccctagaggggctaag  
 tgacatgctcaaggccaccgactcattgtgacacagctttttgtttgt  
 tttgttcttttgagacagccttactctgtcaccatgctgcagtgcaagt  
 gtgtgaacatggctcactacagccgcaacctcccaggctcaggatctct  
 cccacctcagcttccaagtagctgggaccacaggtgcataccgccacac  
 ttggctattttttcatTTTTTgtagagacaggggtctcaccacattgcc  
 aggatggtctccaactcttgagctcaagccatctcccaccttggcctcc  
 caaagtgctgggattacaggtgctgagccagcatccccggcccagagctgg  
 gtcttaataccgagactaacacctttttcttccaggggaagaaggcag  
 aggtcacaagg **tggtgaa** atgttgagcagggcaaatggatcctggagc  
 ccagggtcagagctgctgagcaagagaaaatgcatcttatttctcagttt -823

**E** Intron Sequence

gatgggaactgttagggaaagactctgtgagttgcagc **tctggga** agttt +678  
 gtcagttgttttgcctgagcaggtatcccgggaatggtgaacagtagcc  
 ctcgaggagtgagagcccgagctgccttagttgaagccctgaccattct  
 ctggcctggttataaaggaggtgggtgtcagaaataagggggagta  
 ctggtcttttagcaaaagtgttattaccagtggaattcgcctaggggagtg  
 ttcaacttttgcagcttctttacagggaaatcttcagg **accatttcagc**  
tcaaacaacagtagcaacaacaacaacaaccaaagtcattgattaca  
acgaggctgggtacagctaggctaaagtgcattgaaggcatagtaagccagt  
tccgtgggggatgagtcctctttggatctccttaaaagaaaggagaatgg  
gctggaggggcatgagaggttaggaggtagaagcagttattcattcact +1128
