# Supplementary material for: Notch signaling modulates proliferation and differentiation of intestinal crypt base columnar stem cells
Source: Oxford University Press journal article supplement (doi:10.1242/dev.070763), 2011-12-22
Supplement: dev070763tables1.pdf [file dev070763tables1.pdf]

**Table S1. Oligonucleotide sequences used for PCR genotyping**

| Strain                     | Primer (5' to 3')                    | Product                                  |
|----------------------------|--------------------------------------|------------------------------------------|
| Atoh1 <sup>lacZ/lacZ</sup> | M1-F: TGCTGCATGCAGAAGAGTGGGCTGAGGTAA | 374 bp (WT allele)                       |
| Atoh1 <sup>lacZ/lacZ</sup> | M1-R: TCAGCTTGCACAGCTGTTCCCCTACTTTGA |                                          |
| Atoh1 <sup>lacZ/lacZ</sup> | lacZ-A: GCTGGGATCCGCCATTGTCAGACA     | ~300 bp ( <i>lacZ</i> null allele)       |
| Atoh1 <sup>lacZ/lacZ</sup> | lacZ-S: GCTGGAATTCGCCGATACTG         |                                          |
| Vil-Cre                    | MVP5498-F: ACAGGCACTAAGGGAGCCAATG    | 881 bp (WT allele), ~350 bp (Cre allele) |
| Vil-Cre                    | MVP6378-R: GATTCAGGTCAGAAAGAGGTCACAG |                                          |
| Vil-Cre                    | CreORF-R2: GTTCTTGCGAACCTCATCACT     |                                          |
