# Supplementary material for: Notch signaling modulates proliferation and differentiation of intestinal crypt base columnar stem cells
Source: Oxford University Press journal article supplement (doi:10.1242/dev.070763), 2011-12-22
Supplement: dev070763tables2.pdf [file dev070763tables2.pdf]

**Table S2. Oligonucleotide sequences used for qRT-PCR**

| Gene             | Forward primer (5' to 3') | Reverse primer (5' to 3') |
|------------------|---------------------------|---------------------------|
| <i>Ascl2</i>     | CCTCTCTCGGACCCTCTCTCAG    | CAGTCAAGGTGTGCTTCCATGC    |
| <i>Atoh1</i>     | GCCTTGCCGGACTCGTTCTC      | TCTGTGCCATCATCGCTGTTAGGG  |
| <i>cryptdins</i> | AGGAGCAGCCAGGAGAAG        | ATGTTCAGCGACAGCAGAG       |
| <i>Ephb2</i>     | ATGCTGAAGAAGTGGATG        | CTTGAAGGTTCTGATGG         |
| <i>Ephb3</i>     | AAGAGACTCTCATGGACACGAAAT  | ACTTCCCGCCGCCAGATG        |
| <i>Gapdh</i>     | TCAAGAAGGTGGTGAAGCAGG     | TATTATGGGGGTCTGGGATGG     |
| <i>GAPDH*</i>    | GAGTCCACTGGCGTCTTCACC     | GAGGCATTGCTGATGATCTTGAGG  |
| <i>Gfi1</i>      | TCGTCCGAGTTCGAGGACTT      | CAGAGAGCGGCACAGTGAATT     |
| <i>GFP</i>       | ACCCTCGTGACCACCTGACC      | TGCCGTCGTCCTTGAAGAAGATGG  |
| <i>Lgr5</i>      | CGAGCCTTACAGAGCCTGATACC   | TTGCCGTCGTCCTTATTCCATTGG  |
| <i>lysozyme</i>  | ATGGAATGGCTGGCTACTATGGAG  | CTCACCACCCTCTTGCACATTG    |
| <i>Mmp7</i>      | CAGACTTACCTCGGATCGTAGTGG  | GTTCACTCTGCGTCCTCACC      |
| <i>Neurog3</i>   | ACCCTATCCAAGTCTGCTTGTG    | CGGGAAAAGGTTGTTGTGTCTCTG  |
| <i>Olfm4</i>     | GCCACTTCCAATTTAC          | GAGCCTCTTCTCATAAC         |
| <i>OLFM4*</i>    | TTCTCCTAGCCCTTCTGTTCTTCC  | TTCCAAGCGTTCCACTCTGTCC    |
| <i>Prom1</i>     | CACTCCTGACTGAAACACCAAAGC  | TGCCATCCAGGTCTGAGAATGC    |
| <i>Sox9</i>      | CTGGAGGCTGCTGAACGAGAG     | CGGCGGACCCTGAGATTGC       |
| <i>Spdef</i>     | GGACGGACGACTTCTGACAG      | GCTCCTGATGCTGCCTTCTCC     |

\*Sequences designed to amplify the human gene; all other primers amplify the mouse gene.
