# Supplementary material for: Notch signaling modulates proliferation and differentiation of intestinal crypt base columnar stem cells
Source: Oxford University Press journal article supplement (doi:10.1242/dev.070763), 2011-12-22
Supplement: dev070763tables3.pdf [file dev070763tables3.pdf]

**Table S3. Oligonucleotide sequences used to generate the mutant human *OLFM4* constructs**

| Nucleotides deleted  | Primer sequence (5' to 3')                                                                                |
|----------------------|-----------------------------------------------------------------------------------------------------------|
| -427 to -306         | Forward: TGTGCTGGAATTCGCCTCTGTGTCATCCAC<br>Reverse: GTGGATGACACAGAGGCGAATTCCAGCACA                        |
| -290 to -160         | Forward: CTCTGTGTCATCCACCCTCACTGACAAGGT<br>Reverse: ACCTTGTCAGTGAGGGTGGATGACACAGAG                        |
| -145 to -56          | Forward: CCTCACTGACAAGGTCATGGGGAAATCACC<br>Reverse: GGTGATTTCCCATGACCTTGTGTCAGTGAGG                       |
| -249 to -244 (RBPJa) | Forward: CTCTTTCAAGGAAGTACCAAGACCAAATATTGGGCTTTACAA<br>Reverse: TTGTAAGCCCAATATTTGGTCTTGGTACTTCCTTGAAAGAG |
| -101 to -89 (RBPJb)  | Forward: GAACCTCCTGGGGCCCTGGCCACTCC<br>Reverse: GGAGTGGCCAGGGCCCCAGGAGGTTT                                |
