# Supplementary material for: Notch signaling modulates proliferation and differentiation of intestinal crypt base columnar stem cells
Source: Oxford University Press journal article supplement (doi:10.1242/dev.070763), 2011-12-22
Supplement: dev070763tables4.pdf [file dev070763tables4.pdf]

**Table S4. Oligonucleotide sequences used for quantitative PCR analysis of ChIP**

| Gene (primer location*)                | Forward primer (5' to 3') | Reverse primer (5' to 3') |
|----------------------------------------|---------------------------|---------------------------|
| <i>OLFM4</i> (–146 to –128)            | TGTGGGCCATGACTCAGATTCC    | TATAGTGCCCAGTGGTGATTCCC   |
| <i>OLFM4</i> (–1337 to –1190)          | CCTAGAGGGGCTAAGTGACATGC   | GGAGGTTGCGGCTGTAGTGAG     |
| <i>OLMF4</i> (–11961 to –11783)        | CAGTGGCAATGGAAAACTGA      | CAGCTTTGCCCTCTTTACCA      |
| <i>OLFM4</i> (+917 to +1087)           | ACCATTTCAGCTCCAAACAACAG   | CCCTCCAGCCCATTCTCCTTC     |
| <i>HES1</i> <sup>‡</sup> (–105 to +67) | CCTCCCATTGGCTGAAAGTTACTG  | AGGACCAAGGAGAGAGGTAGACG   |

\*The location of the PCR product is presented as the number of base pairs relative to the transcription start site of the appropriate gene.

<sup>‡</sup>Consensus RBPJκ binding sites are located in the *HES1* promoter at –83 to –76 and –59 to –52 relative to the transcription start site.
