# Supplementary figures and images for: Notch signaling modulates proliferation and differentiation of intestinal crypt base columnar stem cells
Source: Oxford University Press journal article supplement (doi:10.1242/dev.070763), 2011-12-22

Vehicle

DBZ

BrdU

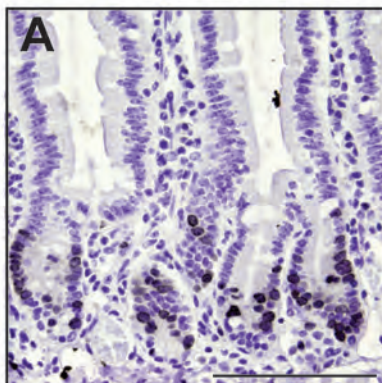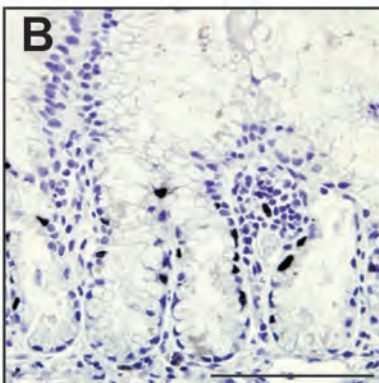

P-SMAD

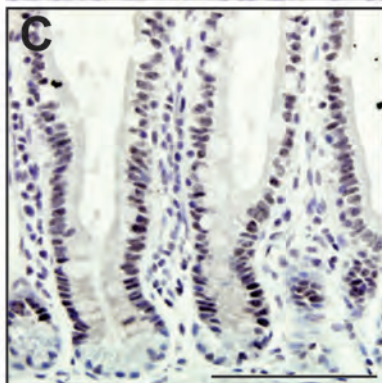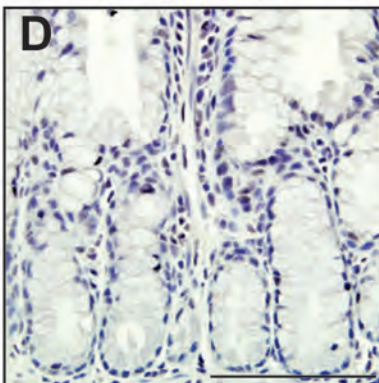

### E Organoid Size

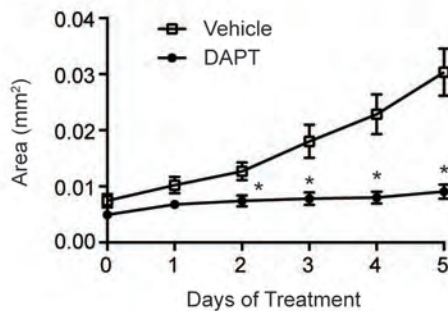

Supplement: dev070763figs1.pdf [file dev070763figs1.pdf]

**A** Sox9 mRNA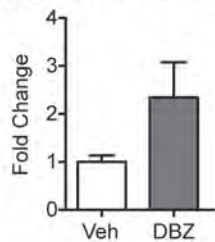**B** Cryptdin mRNA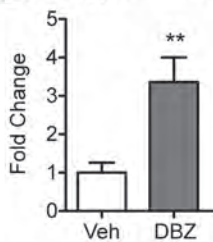**C** Lysozyme mRNA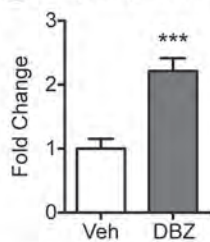**D** MMP7 mRNA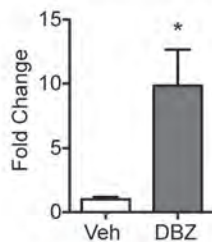**E** EphB2 mRNA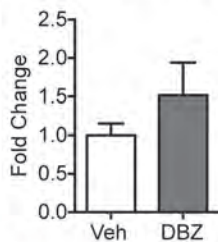**F** EphB3 mRNA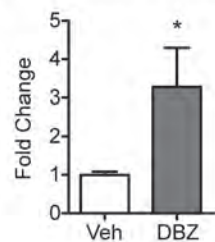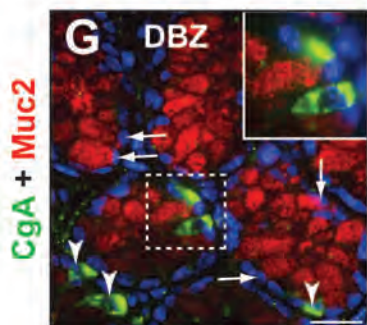

Supplement: dev070763figs2.pdf [file dev070763figs2.pdf]

H&amp;E

CgA

Lysozyme

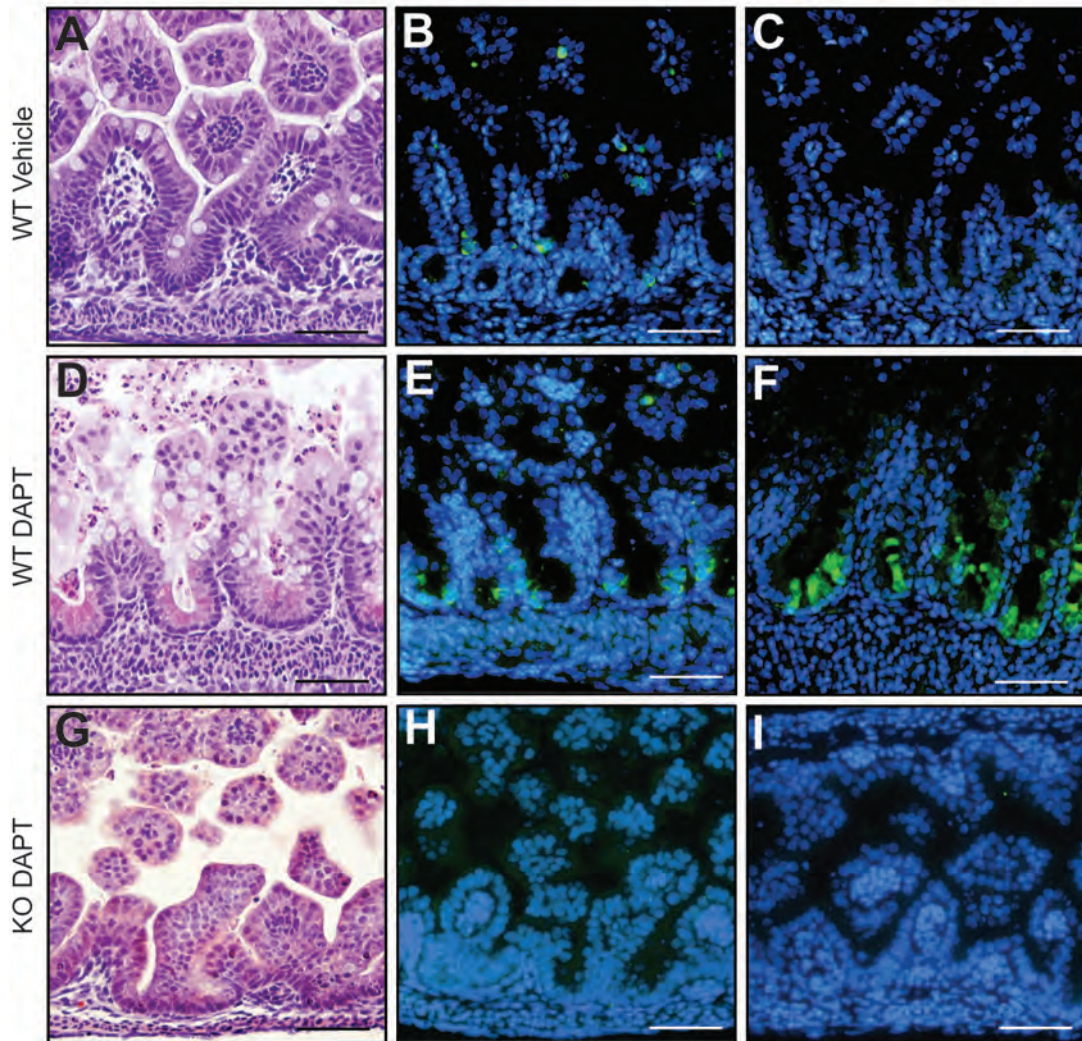

Supplement: dev070763figs3.pdf [file dev070763figs3.pdf]

**A** Olfm4 mRNA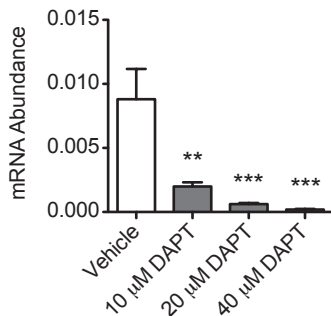**B** Olfm4 mRNA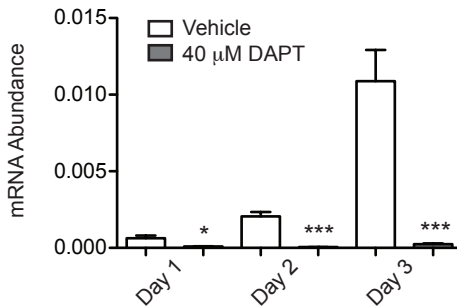**C** Atoh1 mRNA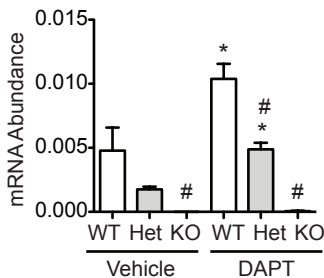**D** Gfi1 mRNA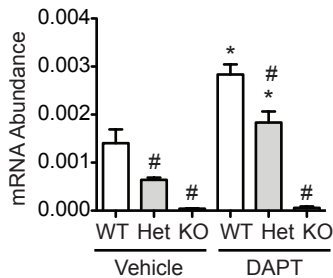**E** Spdef mRNA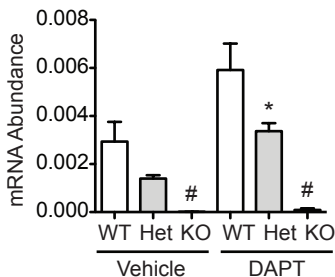**F** Neurog3 mRNA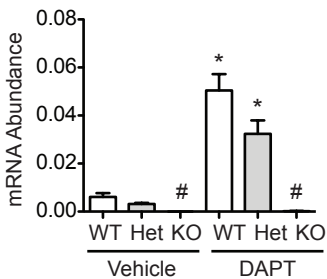

Supplement: dev070763figs4.pdf [file dev070763figs4.pdf]
